# Supplementary material for: Climate vulnerability assessment for Pacific salmon and steelhead in the California Current Large Marine Ecosystem
Source: PLoS One. 2019 Jul 24;14(7):e0217711. doi: 10.1371/journal.pone.0217711 (PMC6655584; doi:10.1371/journal.pone.0217711)
Supplement: S2 Table — (XLSX) [file pone.0217711.s005.xlsx]

## Sheet: All Attributes (rename) (2)
DPS	Species	Component	Attribute/Factor	Data Quality	Low	Moderate	High	Very High	Mean	sd
California Central Valley Steelhead	Steelhead	Sensitivity Attribute	Adult freshwater stage	2.75	11	8	1	0	1.5	0.591608
California Central Valley Steelhead	Steelhead	Sensitivity Attribute	Population viability	2	7	4	9	0	2.1	0.888819
California Central Valley Steelhead	Steelhead	Exposure Factor	Ocean currents	1	7	9	4	0	1.85	0.726292
California Central Valley Steelhead	Steelhead	Sensitivity Attribute	Early life history	2.75	8	12	0	0	1.6	0.489898
California Central Valley Steelhead	Steelhead	Sensitivity Attribute	Estuary stage	1.75	1	11	5	3	2.5	0.806226
California Central Valley Steelhead	Steelhead	Exposure Factor	Flooding	1.75	0	4	8	8	3.2	0.748331
California Central Valley Steelhead	Steelhead	Sensitivity Attribute	Juvenile freshwater stage	2.75	7	6	5	2	2.1	0.994987
California Central Valley Steelhead	Steelhead	Exposure Factor	Hydrologic regime	1.75	8	7	4	1	1.9	0.888819
California Central Valley Steelhead	Steelhead	Sensitivity Attribute	Cumulative life‑cycle effects	2.5	8	5	4	3	1.7	1.09087
California Central Valley Steelhead	Steelhead	Sensitivity Attribute	Marine stage	1.25	10	8	2	0	1.6	0.663325
California Central Valley Steelhead	Steelhead	Exposure Factor	Sea surface temperature	2	0	1	10	9	3.4	0.583095
California Central Valley Steelhead	Steelhead	Exposure Factor	Ocean acidification exposure	3	0	0	0	20	4	0
California Central Valley Steelhead	Steelhead	Sensitivity Attribute	Other stressors	2	1	3	13	3	2.9	0.7
California Central Valley Steelhead	Steelhead	Exposure Factor	Upwelling	1.5	3	8	6	3	2.45	0.920598
California Central Valley Steelhead	Steelhead	Sensitivity Attribute	Hatchery influence	2	0	6	6	8	3.1	0.830662
California Central Valley Steelhead	Steelhead	Exposure Factor	Sea level rise	2	3	11	6	0	2.15	0.653835
California Central Valley Steelhead	Steelhead	Sensitivity Attribute	Ocean acidification sensitivity	0.5	6	11	2	1	1.9	0.768115
California Central Valley Steelhead	Steelhead	Exposure Factor	Stream temperature	2.25	2	5	8	5	2.8	0.927362
California Central Valley Steelhead	Steelhead	Exposure Factor	Summer water deficit	2	3	6	8	3	2.55	0.920598
California Coastal Chinook	Chinook	Sensitivity Attribute	Adult freshwater stage	2.75	0	10	10	0	2.5	0.5
California Coastal Chinook	Chinook	Sensitivity Attribute	Population viability	3	0	4	13	3	2.95	0.589491
California Coastal Chinook	Chinook	Exposure Factor	Ocean currents	1	8	8	3	1	1.85	0.852936
California Coastal Chinook	Chinook	Sensitivity Attribute	Early life history	1.5	9	8	3	0	1.7	0.714143
California Coastal Chinook	Chinook	Sensitivity Attribute	Estuary stage	1.75	1	8	5	6	2.8	0.927362
California Coastal Chinook	Chinook	Exposure Factor	Flooding	1.25	0	0	11	9	3.45	0.497494
California Coastal Chinook	Chinook	Sensitivity Attribute	Juvenile freshwater stage	1.75	2	10	8	0	2.3	0.640312
California Coastal Chinook	Chinook	Exposure Factor	Hydrologic regime	2.5	20	0	0	0	1	0
California Coastal Chinook	Chinook	Sensitivity Attribute	Cumulative life‑cycle effects	1.75	0	4	7	9	3.25	0.766485
California Coastal Chinook	Chinook	Sensitivity Attribute	Marine stage	1.75	2	7	9	2	2.55	0.804674
California Coastal Chinook	Chinook	Exposure Factor	Sea surface temperature	2	0	0	15	5	3.25	0.433013
California Coastal Chinook	Chinook	Exposure Factor	Ocean acidification exposure	2.5	0	0	0	20	4	0
California Coastal Chinook	Chinook	Sensitivity Attribute	Other stressors	1.75	0	0	9	11	3.55	0.497494
California Coastal Chinook	Chinook	Exposure Factor	Upwelling	1	1	2	8	9	3.25	0.829156
California Coastal Chinook	Chinook	Sensitivity Attribute	Hatchery influence	3	19	1	0	0	1.05	0.217945
California Coastal Chinook	Chinook	Exposure Factor	Sea level rise	2	0	2	10	8	3.3	0.640312
California Coastal Chinook	Chinook	Sensitivity Attribute	Ocean acidification sensitivity	1.5	6	13	1	0	1.75	0.53619
California Coastal Chinook	Chinook	Exposure Factor	Stream temperature	2	0	2	11	7	3.25	0.622495
California Coastal Chinook	Chinook	Exposure Factor	Summer water deficit	1.75	1	13	4	2	2.35	0.726292
Central California Coast Coho	Coho	Sensitivity Attribute	Adult freshwater stage	2.75	4	14	2	0	1.9	0.538516
Central California Coast Coho	Coho	Sensitivity Attribute	Population viability	3	0	0	7	13	3.65	0.47697
Central California Coast Coho	Coho	Exposure Factor	Ocean currents	1	9	7	3	1	1.8	0.87178
Central California Coast Coho	Coho	Sensitivity Attribute	Early life history	1.5	0	5	11	4	2.95	0.668954
Central California Coast Coho	Coho	Sensitivity Attribute	Estuary stage	1.5	0	3	10	7	3.2	0.678233
Central California Coast Coho	Coho	Exposure Factor	Flooding	1.25	0	0	7	13	3.65	0.47697
Central California Coast Coho	Coho	Sensitivity Attribute	Juvenile freshwater stage	2.75	0	1	3	16	3.75	0.53619
Central California Coast Coho	Coho	Exposure Factor	Hydrologic regime	2.5	18	2	0	0	1.1	0.3
Central California Coast Coho	Coho	Sensitivity Attribute	Cumulative life‑cycle effects	1.5	0	0	9	11	3.25	0.497494
Central California Coast Coho	Coho	Sensitivity Attribute	Marine stage	2.5	0	2	9	9	3.35	0.653835
Central California Coast Coho	Coho	Exposure Factor	Sea surface temperature	2	0	0	12	8	3.4	0.489898
Central California Coast Coho	Coho	Exposure Factor	Ocean acidification exposure	2.5	0	0	0	20	4	0
Central California Coast Coho	Coho	Sensitivity Attribute	Other stressors	2	0	5	10	5	3	0.707107
Central California Coast Coho	Coho	Exposure Factor	Upwelling	1	1	5	10	4	2.85	0.792149
Central California Coast Coho	Coho	Sensitivity Attribute	Hatchery influence	2.75	0	18	2	0	2.1	0.3
Central California Coast Coho	Coho	Exposure Factor	Sea level rise	2	0	2	10	8	3.3	0.640312
Central California Coast Coho	Coho	Sensitivity Attribute	Ocean acidification sensitivity	1.75	6	13	1	0	1.75	0.53619
Central California Coast Coho	Coho	Exposure Factor	Stream temperature	2	0	3	10	7	3.2	0.678233
Central California Coast Coho	Coho	Exposure Factor	Summer water deficit	1.75	1	13	4	2	2.35	0.726292
Central California Coast Steelhead	Steelhead	Sensitivity Attribute	Adult freshwater stage	2.5	8	8	4	0	1.8	0.748331
Central California Coast Steelhead	Steelhead	Sensitivity Attribute	Population viability	2	0	6	10	4	2.9	0.7
Central California Coast Steelhead	Steelhead	Exposure Factor	Ocean currents	1	7	9	4	0	1.85	0.726292
Central California Coast Steelhead	Steelhead	Sensitivity Attribute	Early life history	2.25	7	12	1	0	1.7	0.556776
Central California Coast Steelhead	Steelhead	Sensitivity Attribute	Estuary stage	1.75	0	6	10	4	2.9	0.7
Central California Coast Steelhead	Steelhead	Exposure Factor	Flooding	1.75	0	5	8	7	3.1	0.768115
Central California Coast Steelhead	Steelhead	Sensitivity Attribute	Juvenile freshwater stage	2.25	2	9	6	3	2.5	0.866025
Central California Coast Steelhead	Steelhead	Exposure Factor	Hydrologic regime	2.25	14	6	0	0	1.3	0.458258
Central California Coast Steelhead	Steelhead	Sensitivity Attribute	Cumulative life‑cycle effects	1.75	5	13	2	0	1.85	0.572276
Central California Coast Steelhead	Steelhead	Sensitivity Attribute	Marine stage	1.75	3	13	3	1	2.1	0.7
Central California Coast Steelhead	Steelhead	Exposure Factor	Sea surface temperature	2	0	1	10	9	3.4	0.583095
Central California Coast Steelhead	Steelhead	Exposure Factor	Ocean acidification exposure	3	0	0	0	20	4	0
Central California Coast Steelhead	Steelhead	Sensitivity Attribute	Other stressors	1.75	1	3	11	5	3	0.774597
Central California Coast Steelhead	Steelhead	Exposure Factor	Upwelling	1.5	3	8	6	3	2.45	0.920598
Central California Coast Steelhead	Steelhead	Sensitivity Attribute	Hatchery influence	2	6	4	7	3	2.35	1.06184
Central California Coast Steelhead	Steelhead	Exposure Factor	Sea level rise	2	0	5	10	5	3	0.707107
Central California Coast Steelhead	Steelhead	Sensitivity Attribute	Ocean acidification sensitivity	0.5	6	11	2	1	1.9	0.768115
Central California Coast Steelhead	Steelhead	Exposure Factor	Stream temperature	2.25	2	6	9	3	2.65	0.852936
Central California Coast Steelhead	Steelhead	Exposure Factor	Summer water deficit	2	3	5	8	4	2.65	0.963068
Central Valley fall-run/late fall-run Chinook	Chinook	Sensitivity Attribute	Adult freshwater stage	2.75	0	5	14	1	2.8	0.509902
Central Valley fall-run/late fall-run Chinook	Chinook	Sensitivity Attribute	Population viability	3	1	9	8	2	2.55	0.739932
Central Valley fall-run/late fall-run Chinook	Chinook	Exposure Factor	Ocean currents	1	8	8	3	1	1.85	0.852936
Central Valley fall-run/late fall-run Chinook	Chinook	Sensitivity Attribute	Early life history	2.5	3	9	8	0	2.25	0.698212
Central Valley fall-run/late fall-run Chinook	Chinook	Sensitivity Attribute	Estuary stage	2.25	0	1	11	8	3.35	0.572276
Central Valley fall-run/late fall-run Chinook	Chinook	Exposure Factor	Flooding	1.25	0	5	6	9	3.55	0.812404
Central Valley fall-run/late fall-run Chinook	Chinook	Sensitivity Attribute	Juvenile freshwater stage	2.75	0	4	15	1	2.85	0.47697
Central Valley fall-run/late fall-run Chinook	Chinook	Exposure Factor	Hydrologic regime	1.75	0	7	12	1	2.45	0.556776
Central Valley fall-run/late fall-run Chinook	Chinook	Sensitivity Attribute	Cumulative life‑cycle effects	2	0	0	8	12	3.65	0.489898
Central Valley fall-run/late fall-run Chinook	Chinook	Sensitivity Attribute	Marine stage	2.5	0	2	11	7	3.25	0.622495
Central Valley fall-run/late fall-run Chinook	Chinook	Exposure Factor	Sea surface temperature	2	0	0	12	8	3.4	0.489898
Central Valley fall-run/late fall-run Chinook	Chinook	Exposure Factor	Ocean acidification exposure	2.5	0	0	0	20	4	0
Central Valley fall-run/late fall-run Chinook	Chinook	Sensitivity Attribute	Other stressors	2.5	0	1	6	13	3.6	0.583095
Central Valley fall-run/late fall-run Chinook	Chinook	Exposure Factor	Upwelling	1	1	2	8	9	3.25	0.829156
Central Valley fall-run/late fall-run Chinook	Chinook	Sensitivity Attribute	Hatchery influence	3	0	0	2	18	3.9	0.3
Central Valley fall-run/late fall-run Chinook	Chinook	Exposure Factor	Sea level rise	2.25	0	4	5	11	3.65	0.792149
Central Valley fall-run/late fall-run Chinook	Chinook	Sensitivity Attribute	Ocean acidification sensitivity	1.5	6	13	1	0	1.75	0.53619
Central Valley fall-run/late fall-run Chinook	Chinook	Exposure Factor	Stream temperature	2	0	10	4	6	2.8	0.87178
Central Valley fall-run/late fall-run Chinook	Chinook	Exposure Factor	Summer water deficit	1.75	0	3	13	4	3.05	0.589491
Central Valley spring-run Chinook	Chinook	Sensitivity Attribute	Adult freshwater stage	3	0	0	4	16	3.8	0.4
Central Valley spring-run Chinook	Chinook	Sensitivity Attribute	Population viability	2.75	0	0	10	10	3.5	0.5
Central Valley spring-run Chinook	Chinook	Exposure Factor	Ocean currents	1	8	8	3	1	1.85	0.852936
Central Valley spring-run Chinook	Chinook	Sensitivity Attribute	Early life history	1.5	7	6	7	0	2	0.83666
Central Valley spring-run Chinook	Chinook	Sensitivity Attribute	Estuary stage	2	0	1	10	9	3.4	0.583095
Central Valley spring-run Chinook	Chinook	Exposure Factor	Flooding	1.25	0	3	8	9	3.55	0.714143
Central Valley spring-run Chinook	Chinook	Sensitivity Attribute	Juvenile freshwater stage	1.75	0	4	16	0	2.8	0.4
Central Valley spring-run Chinook	Chinook	Exposure Factor	Hydrologic regime	1.75	0	7	9	4	2.6	0.726292
Central Valley spring-run Chinook	Chinook	Sensitivity Attribute	Cumulative life‑cycle effects	2.75	0	0	5	15	3.75	0.433013
Central Valley spring-run Chinook	Chinook	Sensitivity Attribute	Marine stage	1.75	1	7	11	1	2.6	0.663325
Central Valley spring-run Chinook	Chinook	Exposure Factor	Sea surface temperature	2	0	0	12	8	3.4	0.489898
Central Valley spring-run Chinook	Chinook	Exposure Factor	Ocean acidification exposure	2.5	0	0	0	20	4	0
Central Valley spring-run Chinook	Chinook	Sensitivity Attribute	Other stressors	2.25	0	1	7	12	3.55	0.589491
Central Valley spring-run Chinook	Chinook	Exposure Factor	Upwelling	1	1	2	8	9	3.25	0.829156
Central Valley spring-run Chinook	Chinook	Sensitivity Attribute	Hatchery influence	3	0	1	4	15	3.7	0.556776
Central Valley spring-run Chinook	Chinook	Exposure Factor	Sea level rise	2.25	0	2	7	11	3.45	0.668954
Central Valley spring-run Chinook	Chinook	Sensitivity Attribute	Ocean acidification sensitivity	1	6	13	1	0	1.75	0.53619
Central Valley spring-run Chinook	Chinook	Exposure Factor	Stream temperature	2	0	8	5	7	2.95	0.864581
Central Valley spring-run Chinook	Chinook	Exposure Factor	Summer water deficit	1.75	0	4	12	4	3	0.632456
Columbia River Chum	Chum	Sensitivity Attribute	Adult freshwater stage	3	11	7	2	0	1.55	0.668954
Columbia River Chum	Chum	Sensitivity Attribute	Population viability	3	0	5	11	4	2.95	0.668954
Columbia River Chum	Chum	Exposure Factor	Ocean currents	1	7	8	5	0	1.9	0.768115
Columbia River Chum	Chum	Sensitivity Attribute	Early life history	2.75	10	8	2	0	1.6	0.663325
Columbia River Chum	Chum	Sensitivity Attribute	Estuary stage	2.75	1	11	8	0	2.35	0.572276
Columbia River Chum	Chum	Exposure Factor	Flooding	2	12	7	1	0	1.45	0.589491
Columbia River Chum	Chum	Sensitivity Attribute	Juvenile freshwater stage	2.75	14	5	1	0	1.35	0.572276
Columbia River Chum	Chum	Exposure Factor	Hydrologic regime	2.75	6	7	6	1	2.1	0.888819
Columbia River Chum	Chum	Sensitivity Attribute	Cumulative life‑cycle effects	2.25	0	8	10	2	2.7	0.640312
Columbia River Chum	Chum	Sensitivity Attribute	Marine stage	1.75	6	8	5	1	2.05	0.864581
Columbia River Chum	Chum	Exposure Factor	Sea surface temperature	2.5	0	7	10	3	2.8	0.678233
Columbia River Chum	Chum	Exposure Factor	Ocean acidification exposure	3	0	0	3	17	3.85	0.357071
Columbia River Chum	Chum	Sensitivity Attribute	Other stressors	2.25	2	9	7	2	2.45	0.804674
Columbia River Chum	Chum	Exposure Factor	Upwelling	2	8	9	3	0	1.75	0.698212
Columbia River Chum	Chum	Sensitivity Attribute	Hatchery influence	2.75	10	10	0	0	1.5	0.5
Columbia River Chum	Chum	Exposure Factor	Sea level rise	2	1	7	10	2	2.65	0.726292
Columbia River Chum	Chum	Sensitivity Attribute	Ocean acidification sensitivity	1	6	10	4	0	1.9	0.7
Columbia River Chum	Chum	Exposure Factor	Stream temperature	2.75	6	6	6	2	2.2	0.979796
Columbia River Chum	Chum	Exposure Factor	Summer water deficit	2	11	8	1	0	1.5	0.591608
Hood Canal Summer-run Chum	Chum	Sensitivity Attribute	Adult freshwater stage	3	0	7	11	2	2.75	0.622495
Hood Canal Summer-run Chum	Chum	Sensitivity Attribute	Population viability	3	0	5	9	6	3.05	0.739932
Hood Canal Summer-run Chum	Chum	Exposure Factor	Ocean currents	1	8	8	4	0	1.8	0.748331
Hood Canal Summer-run Chum	Chum	Sensitivity Attribute	Early life history	2.75	0	7	10	3	2.8	0.678233
Hood Canal Summer-run Chum	Chum	Sensitivity Attribute	Estuary stage	2.75	1	10	8	1	2.45	0.668954
Hood Canal Summer-run Chum	Chum	Exposure Factor	Flooding	2	7	7	6	0	1.95	0.804674
Hood Canal Summer-run Chum	Chum	Sensitivity Attribute	Juvenile freshwater stage	2.75	13	6	1	0	1.4	0.583095
Hood Canal Summer-run Chum	Chum	Exposure Factor	Hydrologic regime	2.75	14	6	0	0	1.3	0.458258
Hood Canal Summer-run Chum	Chum	Sensitivity Attribute	Cumulative life‑cycle effects	2.25	0	2	10	8	3.3	0.640312
Hood Canal Summer-run Chum	Chum	Sensitivity Attribute	Marine stage	1.75	6	8	5	1	2.05	0.864581
Hood Canal Summer-run Chum	Chum	Exposure Factor	Sea surface temperature	2.5	0	7	10	3	2.8	0.678233
Hood Canal Summer-run Chum	Chum	Exposure Factor	Ocean acidification exposure	3	0	0	3	17	3.85	0.357071
Hood Canal Summer-run Chum	Chum	Sensitivity Attribute	Other stressors	2.5	3	10	5	2	2.3	0.842615
Hood Canal Summer-run Chum	Chum	Exposure Factor	Upwelling	2	10	9	1	0	1.55	0.589491
Hood Canal Summer-run Chum	Chum	Sensitivity Attribute	Hatchery influence	2	4	10	5	1	2.15	0.792149
Hood Canal Summer-run Chum	Chum	Exposure Factor	Sea level rise	2	0	7	11	2	2.75	0.622495
Hood Canal Summer-run Chum	Chum	Sensitivity Attribute	Ocean acidification sensitivity	1	6	10	4	0	1.9	0.7
Hood Canal Summer-run Chum	Chum	Exposure Factor	Stream temperature	2.75	0	4	10	6	3.1	0.7
Hood Canal Summer-run Chum	Chum	Exposure Factor	Summer water deficit	2	0	4	11	5	3.05	0.668954
Lake Ozette Sockeye	Sockeye	Sensitivity Attribute	Adult freshwater stage	2.75	11	7	2	0	1.55	0.668954
Lake Ozette Sockeye	Sockeye	Sensitivity Attribute	Population viability	2.5	0	7	10	3	2.8	0.678233
Lake Ozette Sockeye	Sockeye	Exposure Factor	Ocean currents	1	8	8	4	0	1.8	0.748331
Lake Ozette Sockeye	Sockeye	Sensitivity Attribute	Early life history	2.75	5	10	5	0	2	0.707107
Lake Ozette Sockeye	Sockeye	Sensitivity Attribute	Estuary stage	2.25	15	5	0	0	1.25	0.433013
Lake Ozette Sockeye	Sockeye	Exposure Factor	Flooding	2	7	10	3	0	1.8	0.678233
Lake Ozette Sockeye	Sockeye	Sensitivity Attribute	Juvenile freshwater stage	2.75	5	8	4	3	2.25	0.99373
Lake Ozette Sockeye	Sockeye	Exposure Factor	Hydrologic regime	2.5	15	5	0	0	1.25	0.433013
Lake Ozette Sockeye	Sockeye	Sensitivity Attribute	Cumulative life‑cycle effects	2	5	12	3	0	1.9	0.6245
Lake Ozette Sockeye	Sockeye	Sensitivity Attribute	Marine stage	2	1	12	6	1	2.35	0.653835
Lake Ozette Sockeye	Sockeye	Exposure Factor	Sea surface temperature	2.25	0	4	8	8	3.2	0.748331
Lake Ozette Sockeye	Sockeye	Exposure Factor	Ocean acidification exposure	3	0	0	3	17	3.85	0.357071
Lake Ozette Sockeye	Sockeye	Sensitivity Attribute	Other stressors	2.5	1	6	12	1	2.65	0.653835
Lake Ozette Sockeye	Sockeye	Exposure Factor	Upwelling	1.75	8	11	1	0	1.65	0.572276
Lake Ozette Sockeye	Sockeye	Sensitivity Attribute	Hatchery influence	2	5	14	1	0	1.8	0.509902
Lake Ozette Sockeye	Sockeye	Exposure Factor	Sea level rise	2	15	5	0	0	1.25	0.433013
Lake Ozette Sockeye	Sockeye	Sensitivity Attribute	Ocean acidification sensitivity	1.75	1	12	7	0	2.3	0.556776
Lake Ozette Sockeye	Sockeye	Exposure Factor	Stream temperature	2.75	0	3	8	9	3.3	0.714143
Lake Ozette Sockeye	Sockeye	Exposure Factor	Summer water deficit	2	4	10	1	5	2.35	1.06184
Lower Columbia River Chinook	Chinook	Sensitivity Attribute	Adult freshwater stage	3	9	11	0	0	1.55	0.497494
Lower Columbia River Chinook	Chinook	Sensitivity Attribute	Population viability	2.5	1	9	10	0	2.45	0.589491
Lower Columbia River Chinook	Chinook	Exposure Factor	Ocean currents	1.25	6	9	5	0	1.95	0.739932
Lower Columbia River Chinook	Chinook	Sensitivity Attribute	Early life history	3	15	5	0	0	1.25	0.433013
Lower Columbia River Chinook	Chinook	Sensitivity Attribute	Estuary stage	2.25	2	13	5	0	2.05	0.572276
Lower Columbia River Chinook	Chinook	Exposure Factor	Flooding	2	8	5	7	0	1.95	0.864581
Lower Columbia River Chinook	Chinook	Sensitivity Attribute	Juvenile freshwater stage	3	11	9	0	0	1.45	0.497494
Lower Columbia River Chinook	Chinook	Exposure Factor	Hydrologic regime	2.5	5	3	11	1	2.4	0.916515
Lower Columbia River Chinook	Chinook	Sensitivity Attribute	Cumulative life‑cycle effects	1.75	14	6	0	0	1.3	0.458258
Lower Columbia River Chinook	Chinook	Sensitivity Attribute	Marine stage	2.5	0	7	11	2	2.75	0.622495
Lower Columbia River Chinook	Chinook	Exposure Factor	Sea surface temperature	2	0	3	7	10	3.35	0.726292
Lower Columbia River Chinook	Chinook	Exposure Factor	Ocean acidification exposure	2.5	0	0	4	16	3.8	0.4
Lower Columbia River Chinook	Chinook	Sensitivity Attribute	Other stressors	2.25	2	10	7	1	2.35	0.726292
Lower Columbia River Chinook	Chinook	Exposure Factor	Upwelling	1.75	6	6	5	3	2.25	1.04283
Lower Columbia River Chinook	Chinook	Sensitivity Attribute	Hatchery influence	2.5	0	3	9	8	3.25	0.698212
Lower Columbia River Chinook	Chinook	Exposure Factor	Sea level rise	2.25	6	6	8	0	2.1	0.830662
Lower Columbia River Chinook	Chinook	Sensitivity Attribute	Ocean acidification sensitivity	1.75	5	12	3	0	1.9	0.6245
Lower Columbia River Chinook	Chinook	Exposure Factor	Stream temperature	2.25	0	2	8	10	3.4	0.663325
Lower Columbia River Chinook	Chinook	Exposure Factor	Summer water deficit	1.75	0	16	3	1	2.25	0.53619
Lower Columbia River Coho	Coho	Sensitivity Attribute	Adult freshwater stage	3	9	9	2	0	1.65	0.653835
Lower Columbia River Coho	Coho	Sensitivity Attribute	Population viability	3	0	7	9	4	2.85	0.726292
Lower Columbia River Coho	Coho	Exposure Factor	Ocean currents	1	7	8	5	0	1.9	0.768115
Lower Columbia River Coho	Coho	Sensitivity Attribute	Early life history	2.75	10	7	3	0	1.65	0.726292
Lower Columbia River Coho	Coho	Sensitivity Attribute	Estuary stage	2.75	7	10	3	0	1.8	0.678233
Lower Columbia River Coho	Coho	Exposure Factor	Flooding	2	12	6	2	0	1.5	0.67082
Lower Columbia River Coho	Coho	Sensitivity Attribute	Juvenile freshwater stage	2.75	0	5	7	8	3.15	0.792149
Lower Columbia River Coho	Coho	Exposure Factor	Hydrologic regime	3	6	5	8	1	2.2	0.927362
Lower Columbia River Coho	Coho	Sensitivity Attribute	Cumulative life‑cycle effects	2.25	5	10	5	0	2	0.707107
Lower Columbia River Coho	Coho	Sensitivity Attribute	Marine stage	2.25	0	5	10	5	3	0.707107
Lower Columbia River Coho	Coho	Exposure Factor	Sea surface temperature	2.5	0	7	10	3	2.8	0.678233
Lower Columbia River Coho	Coho	Exposure Factor	Ocean acidification exposure	3	0	0	3	17	3.85	0.357071
Lower Columbia River Coho	Coho	Sensitivity Attribute	Other stressors	2.5	2	9	6	3	2.5	0.866025
Lower Columbia River Coho	Coho	Exposure Factor	Upwelling	2	8	9	3	0	1.75	0.698212
Lower Columbia River Coho	Coho	Sensitivity Attribute	Hatchery influence	2.75	0	6	10	4	2.9	0.7
Lower Columbia River Coho	Coho	Exposure Factor	Sea level rise	2	7	7	5	1	2	0.894427
Lower Columbia River Coho	Coho	Sensitivity Attribute	Ocean acidification sensitivity	1	6	10	4	0	1.9	0.7
Lower Columbia River Coho	Coho	Exposure Factor	Stream temperature	2.75	0	2	11	7	3.25	0.622495
Lower Columbia River Coho	Coho	Exposure Factor	Summer water deficit	2	0	9	8	3	2.7	0.714143
Lower Columbia River Steelhead	Steelhead	Sensitivity Attribute	Adult freshwater stage	2.75	9	11	0	0	1.55	0.497494
Lower Columbia River Steelhead	Steelhead	Sensitivity Attribute	Population viability	2.75	4	6	6	4	2.5	1.0247
Lower Columbia River Steelhead	Steelhead	Exposure Factor	Ocean currents	1	9	7	4	0	1.75	0.766485
Lower Columbia River Steelhead	Steelhead	Sensitivity Attribute	Early life history	2.75	10	10	0	0	1.5	0.5
Lower Columbia River Steelhead	Steelhead	Sensitivity Attribute	Estuary stage	2.25	8	11	1	0	1.65	0.572276
Lower Columbia River Steelhead	Steelhead	Exposure Factor	Flooding	2	8	4	8	0	2	0.894427
Lower Columbia River Steelhead	Steelhead	Sensitivity Attribute	Juvenile freshwater stage	2.75	5	10	4	1	2.05	0.804674
Lower Columbia River Steelhead	Steelhead	Exposure Factor	Hydrologic regime	2.75	9	8	3	0	1.7	0.714143
Lower Columbia River Steelhead	Steelhead	Sensitivity Attribute	Cumulative life‑cycle effects	2	6	12	2	0	1.8	0.6
Lower Columbia River Steelhead	Steelhead	Sensitivity Attribute	Marine stage	2	5	12	2	1	1.95	0.739932
Lower Columbia River Steelhead	Steelhead	Exposure Factor	Sea surface temperature	2.25	0	4	8	8	3.2	0.748331
Lower Columbia River Steelhead	Steelhead	Exposure Factor	Ocean acidification exposure	3	0	0	3	17	3.85	0.357071
Lower Columbia River Steelhead	Steelhead	Sensitivity Attribute	Other stressors	2.5	1	5	13	1	2.7	0.640312
Lower Columbia River Steelhead	Steelhead	Exposure Factor	Upwelling	1.75	9	10	1	0	1.6	0.583095
Lower Columbia River Steelhead	Steelhead	Sensitivity Attribute	Hatchery influence	2.5	0	3	10	7	3.2	0.678233
Lower Columbia River Steelhead	Steelhead	Exposure Factor	Sea level rise	2	8	9	3	0	1.75	0.698212
Lower Columbia River Steelhead	Steelhead	Sensitivity Attribute	Ocean acidification sensitivity	1.75	5	13	2	0	1.85	0.572276
Lower Columbia River Steelhead	Steelhead	Exposure Factor	Stream temperature	2.5	0	3	6	11	3.4	0.734847
Lower Columbia River Steelhead	Steelhead	Exposure Factor	Summer water deficit	2	2	10	3	5	2.55	0.973396
Middle Columbia River Spring-run Chinook	Chinook	Sensitivity Attribute	Adult freshwater stage	3	0	1	5	14	3.65	0.572276
Middle Columbia River Spring-run Chinook	Chinook	Sensitivity Attribute	Population viability	2.5	1	10	9	0	2.4	0.583095
Middle Columbia River Spring-run Chinook	Chinook	Exposure Factor	Ocean currents	1.25	7	10	3	0	1.8	0.678233
Middle Columbia River Spring-run Chinook	Chinook	Sensitivity Attribute	Early life history	2.5	14	6	0	0	1.3	0.458258
Middle Columbia River Spring-run Chinook	Chinook	Sensitivity Attribute	Estuary stage	2.25	11	9	0	0	1.45	0.497494
Middle Columbia River Spring-run Chinook	Chinook	Exposure Factor	Flooding	2	5	5	7	3	2.4	1.0198
Middle Columbia River Spring-run Chinook	Chinook	Sensitivity Attribute	Juvenile freshwater stage	2.5	0	3	4	13	3.35	0.74162
Middle Columbia River Spring-run Chinook	Chinook	Exposure Factor	Hydrologic regime	2.5	0	0	7	13	3.4	0.47697
Middle Columbia River Spring-run Chinook	Chinook	Sensitivity Attribute	Cumulative life‑cycle effects	2.5	0	5	7	8	2.95	0.792149
Middle Columbia River Spring-run Chinook	Chinook	Sensitivity Attribute	Marine stage	2	0	8	10	2	2.7	0.640312
Middle Columbia River Spring-run Chinook	Chinook	Exposure Factor	Sea surface temperature	2	0	3	7	10	3.35	0.726292
Middle Columbia River Spring-run Chinook	Chinook	Exposure Factor	Ocean acidification exposure	2.5	0	0	4	16	3.8	0.4
Middle Columbia River Spring-run Chinook	Chinook	Sensitivity Attribute	Other stressors	3	0	2	10	8	3.3	0.640312
Middle Columbia River Spring-run Chinook	Chinook	Exposure Factor	Upwelling	1.75	6	6	5	3	2.25	1.04283
Middle Columbia River Spring-run Chinook	Chinook	Sensitivity Attribute	Hatchery influence	2.5	0	7	12	1	2.7	0.556776
Middle Columbia River Spring-run Chinook	Chinook	Exposure Factor	Sea level rise	2.25	7	8	5	0	1.9	0.768115
Middle Columbia River Spring-run Chinook	Chinook	Sensitivity Attribute	Ocean acidification sensitivity	1.75	5	12	3	0	1.9	0.6245
Middle Columbia River Spring-run Chinook	Chinook	Exposure Factor	Stream temperature	2.25	0	2	8	10	3.4	0.663325
Middle Columbia River Spring-run Chinook	Chinook	Exposure Factor	Summer water deficit	1.75	0	8	5	7	2.55	0.864581
Middle Columbia River Steelhead	Steelhead	Sensitivity Attribute	Adult freshwater stage	2.5	0	3	13	4	3.05	0.589491
Middle Columbia River Steelhead	Steelhead	Sensitivity Attribute	Population viability	2.75	4	7	8	1	2.3	0.842615
Middle Columbia River Steelhead	Steelhead	Exposure Factor	Ocean currents	1	9	7	4	0	1.75	0.766485
Middle Columbia River Steelhead	Steelhead	Sensitivity Attribute	Early life history	2.75	10	10	0	0	1.5	0.5
Middle Columbia River Steelhead	Steelhead	Sensitivity Attribute	Estuary stage	2.25	9	10	1	0	1.6	0.583095
Middle Columbia River Steelhead	Steelhead	Exposure Factor	Flooding	2	1	4	12	3	2.85	0.726292
Middle Columbia River Steelhead	Steelhead	Sensitivity Attribute	Juvenile freshwater stage	2.75	4	11	4	1	2.1	0.768115
Middle Columbia River Steelhead	Steelhead	Exposure Factor	Hydrologic regime	2.75	1	4	8	7	3.05	0.864581
Middle Columbia River Steelhead	Steelhead	Sensitivity Attribute	Cumulative life‑cycle effects	2	0	8	8	4	2.8	0.748331
Middle Columbia River Steelhead	Steelhead	Sensitivity Attribute	Marine stage	2	5	12	2	1	1.95	0.739932
Middle Columbia River Steelhead	Steelhead	Exposure Factor	Sea surface temperature	2.25	0	4	8	8	3.2	0.748331
Middle Columbia River Steelhead	Steelhead	Exposure Factor	Ocean acidification exposure	3	0	0	3	17	3.85	0.357071
Middle Columbia River Steelhead	Steelhead	Sensitivity Attribute	Other stressors	2.5	0	3	13	4	3.05	0.589491
Middle Columbia River Steelhead	Steelhead	Exposure Factor	Upwelling	1.75	9	10	1	0	1.6	0.583095
Middle Columbia River Steelhead	Steelhead	Sensitivity Attribute	Hatchery influence	2.5	0	3	10	7	3.2	0.678233
Middle Columbia River Steelhead	Steelhead	Exposure Factor	Sea level rise	2	11	8	1	0	1.5	0.591608
Middle Columbia River Steelhead	Steelhead	Sensitivity Attribute	Ocean acidification sensitivity	1.75	5	13	2	0	1.85	0.572276
Middle Columbia River Steelhead	Steelhead	Exposure Factor	Stream temperature	2.5	1	4	7	8	3.1	0.888819
Middle Columbia River Steelhead	Steelhead	Exposure Factor	Summer water deficit	2	2	6	5	7	2.85	1.01366
Northern California Steelhead	Steelhead	Sensitivity Attribute	Adult freshwater stage	2.25	5	9	4	2	2.15	0.90967
Northern California Steelhead	Steelhead	Sensitivity Attribute	Population viability	2.25	0	10	9	1	2.55	0.589491
Northern California Steelhead	Steelhead	Exposure Factor	Ocean currents	1	7	9	4	0	1.85	0.726292
Northern California Steelhead	Steelhead	Sensitivity Attribute	Early life history	2.25	6	11	3	0	1.85	0.653835
Northern California Steelhead	Steelhead	Sensitivity Attribute	Estuary stage	1.75	1	9	6	4	2.65	0.852936
Northern California Steelhead	Steelhead	Exposure Factor	Flooding	1.75	0	4	10	6	3.1	0.7
Northern California Steelhead	Steelhead	Sensitivity Attribute	Juvenile freshwater stage	2.25	2	7	7	4	2.65	0.90967
Northern California Steelhead	Steelhead	Exposure Factor	Hydrologic regime	2.25	11	8	1	0	1.5	0.591608
Northern California Steelhead	Steelhead	Sensitivity Attribute	Cumulative life‑cycle effects	2	5	13	2	0	1.85	0.572276
Northern California Steelhead	Steelhead	Sensitivity Attribute	Marine stage	1.75	2	11	5	2	2.35	0.792149
Northern California Steelhead	Steelhead	Exposure Factor	Sea surface temperature	2	0	2	9	9	3.35	0.653835
Northern California Steelhead	Steelhead	Exposure Factor	Ocean acidification exposure	3	0	0	0	20	4	0
Northern California Steelhead	Steelhead	Sensitivity Attribute	Other stressors	1.75	1	4	11	4	2.9	0.768115
Northern California Steelhead	Steelhead	Exposure Factor	Upwelling	1.5	3	8	6	3	2.45	0.920598
Northern California Steelhead	Steelhead	Sensitivity Attribute	Hatchery influence	1.75	1	7	9	3	2.7	0.781025
Northern California Steelhead	Steelhead	Exposure Factor	Sea level rise	2	1	6	9	4	2.8	0.812404
Northern California Steelhead	Steelhead	Sensitivity Attribute	Ocean acidification sensitivity	0.5	6	11	2	1	1.9	0.768115
Northern California Steelhead	Steelhead	Exposure Factor	Stream temperature	2.25	1	8	7	4	2.7	0.842615
Northern California Steelhead	Steelhead	Exposure Factor	Summer water deficit	2	2	11	3	4	2.45	0.920598
Oregon Coast Coho	Coho	Sensitivity Attribute	Adult freshwater stage	3	10	9	1	0	1.55	0.589491
Oregon Coast Coho	Coho	Sensitivity Attribute	Population viability	3	5	8	6	1	2.15	0.852936
Oregon Coast Coho	Coho	Exposure Factor	Ocean currents	1	7	8	5	0	1.9	0.768115
Oregon Coast Coho	Coho	Sensitivity Attribute	Early life history	2.75	8	9	3	0	1.75	0.698212
Oregon Coast Coho	Coho	Sensitivity Attribute	Estuary stage	2.75	2	10	8	0	2.3	0.640312
Oregon Coast Coho	Coho	Exposure Factor	Flooding	2	11	7	2	0	1.55	0.668954
Oregon Coast Coho	Coho	Sensitivity Attribute	Juvenile freshwater stage	2.75	0	5	8	7	3.1	0.768115
Oregon Coast Coho	Coho	Exposure Factor	Hydrologic regime	3	16	3	1	0	1.25	0.53619
Oregon Coast Coho	Coho	Sensitivity Attribute	Cumulative life‑cycle effects	2.25	4	11	5	0	2.05	0.668954
Oregon Coast Coho	Coho	Sensitivity Attribute	Marine stage	2.25	0	5	10	5	3	0.707107
Oregon Coast Coho	Coho	Exposure Factor	Sea surface temperature	2.5	0	7	10	3	2.8	0.678233
Oregon Coast Coho	Coho	Exposure Factor	Ocean acidification exposure	3	0	0	3	17	3.85	0.357071
Oregon Coast Coho	Coho	Sensitivity Attribute	Other stressors	2.75	0	10	9	1	2.55	0.589491
Oregon Coast Coho	Coho	Exposure Factor	Upwelling	2	9	9	2	0	1.65	0.653835
Oregon Coast Coho	Coho	Sensitivity Attribute	Hatchery influence	2.75	15	5	0	0	1.25	0.433013
Oregon Coast Coho	Coho	Exposure Factor	Sea level rise	2	7	7	5	1	2	0.894427
Oregon Coast Coho	Coho	Sensitivity Attribute	Ocean acidification sensitivity	1	6	10	4	0	1.9	0.7
Oregon Coast Coho	Coho	Exposure Factor	Stream temperature	2.75	0	3	10	7	3.2	0.678233
Oregon Coast Coho	Coho	Exposure Factor	Summer water deficit	2	0	9	8	3	2.7	0.714143
Puget Sound Chinook	Chinook	Sensitivity Attribute	Adult freshwater stage	3	2	4	8	6	2.9	0.943398
Puget Sound Chinook	Chinook	Sensitivity Attribute	Population viability	3	0	7	9	4	2.85	0.726292
Puget Sound Chinook	Chinook	Exposure Factor	Ocean currents	1.25	6	9	5	0	1.95	0.739932
Puget Sound Chinook	Chinook	Sensitivity Attribute	Early life history	2.5	0	3	5	12	3.45	0.739932
Puget Sound Chinook	Chinook	Sensitivity Attribute	Estuary stage	2.5	0	7	13	0	2.65	0.47697
Puget Sound Chinook	Chinook	Exposure Factor	Flooding	2	3	7	8	2	2.45	0.864581
Puget Sound Chinook	Chinook	Sensitivity Attribute	Juvenile freshwater stage	2	1	9	7	3	2.3	0.8
Puget Sound Chinook	Chinook	Exposure Factor	Hydrologic regime	2.5	0	0	13	7	3.35	0.47697
Puget Sound Chinook	Chinook	Sensitivity Attribute	Cumulative life‑cycle effects	1.75	5	7	6	2	2	0.942072
Puget Sound Chinook	Chinook	Sensitivity Attribute	Marine stage	2.5	0	5	15	0	2.75	0.433013
Puget Sound Chinook	Chinook	Exposure Factor	Sea surface temperature	2	0	3	13	4	3.05	0.589491
Puget Sound Chinook	Chinook	Exposure Factor	Ocean acidification exposure	2.5	0	0	4	16	3.8	0.4
Puget Sound Chinook	Chinook	Sensitivity Attribute	Other stressors	2.75	0	2	5	13	3.55	0.668954
Puget Sound Chinook	Chinook	Exposure Factor	Upwelling	1.75	6	6	5	3	2.25	1.04283
Puget Sound Chinook	Chinook	Sensitivity Attribute	Hatchery influence	2.25	0	7	12	1	2.7	0.556776
Puget Sound Chinook	Chinook	Exposure Factor	Sea level rise	2.25	6	5	9	0	2.15	0.852936
Puget Sound Chinook	Chinook	Sensitivity Attribute	Ocean acidification sensitivity	2.25	4	13	3	0	1.95	0.589491
Puget Sound Chinook	Chinook	Exposure Factor	Stream temperature	2.25	0	2	8	10	3.4	0.663325
Puget Sound Chinook	Chinook	Exposure Factor	Summer water deficit	1.75	0	16	3	1	2.25	0.53619
Puget Sound Chum	Chum	Sensitivity Attribute	Adult freshwater stage	3	11	7	2	0	1.55	0.668954
Puget Sound Chum	Chum	Sensitivity Attribute	Population viability	3	7	11	2	0	1.75	0.622495
Puget Sound Chum	Chum	Exposure Factor	Ocean currents	1	8	8	4	0	1.8	0.748331
Puget Sound Chum	Chum	Sensitivity Attribute	Early life history	2.75	9	9	2	0	1.65	0.653835
Puget Sound Chum	Chum	Sensitivity Attribute	Estuary stage	2.75	1	9	9	1	2.5	0.67082
Puget Sound Chum	Chum	Exposure Factor	Flooding	2	8	8	4	0	1.8	0.748331
Puget Sound Chum	Chum	Sensitivity Attribute	Juvenile freshwater stage	2.75	13	6	1	0	1.4	0.583095
Puget Sound Chum	Chum	Exposure Factor	Hydrologic regime	2.75	0	6	10	4	2.9	0.7
Puget Sound Chum	Chum	Sensitivity Attribute	Cumulative life‑cycle effects	2.25	4	8	6	2	2.3	0.9
Puget Sound Chum	Chum	Sensitivity Attribute	Marine stage	1.75	5	7	7	1	2.2	0.87178
Puget Sound Chum	Chum	Exposure Factor	Sea surface temperature	2.5	0	6	11	3	2.85	0.653835
Puget Sound Chum	Chum	Exposure Factor	Ocean acidification exposure	3	0	0	3	17	3.85	0.357071
Puget Sound Chum	Chum	Sensitivity Attribute	Other stressors	2.5	0	6	9	5	2.95	0.739932
Puget Sound Chum	Chum	Exposure Factor	Upwelling	2	11	9	0	0	1.45	0.497494
Puget Sound Chum	Chum	Sensitivity Attribute	Hatchery influence	2.25	9	8	2	1	1.75	0.829156
Puget Sound Chum	Chum	Exposure Factor	Sea level rise	2	0	7	10	3	2.8	0.678233
Puget Sound Chum	Chum	Sensitivity Attribute	Ocean acidification sensitivity	1	6	10	4	0	1.9	0.7
Puget Sound Chum	Chum	Exposure Factor	Stream temperature	2.75	7	7	5	1	2	0.894427
Puget Sound Chum	Chum	Exposure Factor	Summer water deficit	2	9	11	0	0	1.55	0.497494
Puget Sound Coho	Coho	Sensitivity Attribute	Adult freshwater stage	3	7	9	4	0	1.85	0.726292
Puget Sound Coho	Coho	Sensitivity Attribute	Population viability	3	3	12	5	0	2.1	0.6245
Puget Sound Coho	Coho	Exposure Factor	Ocean currents	1	8	8	4	0	1.8	0.748331
Puget Sound Coho	Coho	Sensitivity Attribute	Early life history	2.75	6	8	5	1	2.05	0.864581
Puget Sound Coho	Coho	Sensitivity Attribute	Estuary stage	2.75	5	11	4	0	1.95	0.668954
Puget Sound Coho	Coho	Exposure Factor	Flooding	2	8	8	4	0	1.8	0.748331
Puget Sound Coho	Coho	Sensitivity Attribute	Juvenile freshwater stage	2.75	0	4	10	6	3.1	0.7
Puget Sound Coho	Coho	Exposure Factor	Hydrologic regime	2.75	0	5	8	7	3.1	0.768115
Puget Sound Coho	Coho	Sensitivity Attribute	Cumulative life‑cycle effects	2.25	6	10	4	0	1.9	0.7
Puget Sound Coho	Coho	Sensitivity Attribute	Marine stage	2.25	0	4	11	5	3.05	0.668954
Puget Sound Coho	Coho	Exposure Factor	Sea surface temperature	2.5	0	6	11	3	2.85	0.653835
Puget Sound Coho	Coho	Exposure Factor	Ocean acidification exposure	3	0	0	3	17	3.85	0.357071
Puget Sound Coho	Coho	Sensitivity Attribute	Other stressors	2.75	0	3	9	8	3.25	0.698212
Puget Sound Coho	Coho	Exposure Factor	Upwelling	2	11	9	0	0	1.45	0.497494
Puget Sound Coho	Coho	Sensitivity Attribute	Hatchery influence	2.75	0	6	11	3	2.85	0.653835
Puget Sound Coho	Coho	Exposure Factor	Sea level rise	2	1	9	9	1	2.5	0.67082
Puget Sound Coho	Coho	Sensitivity Attribute	Ocean acidification sensitivity	1	6	10	4	0	1.9	0.7
Puget Sound Coho	Coho	Exposure Factor	Stream temperature	2.75	0	3	10	7	3.2	0.678233
Puget Sound Coho	Coho	Exposure Factor	Summer water deficit	2	0	9	9	2	2.65	0.653835
Puget Sound Pink	Pink	Sensitivity Attribute	Adult freshwater stage	3	6	9	4	1	2	0.83666
Puget Sound Pink	Pink	Sensitivity Attribute	Population viability	3	15	4	1	0	1.3	0.556776
Puget Sound Pink	Pink	Exposure Factor	Ocean currents	1	5	9	6	0	2.05	0.739932
Puget Sound Pink	Pink	Sensitivity Attribute	Early life history	2.75	0	7	10	3	2.8	0.678233
Puget Sound Pink	Pink	Sensitivity Attribute	Estuary stage	2.75	1	10	9	0	2.4	0.583095
Puget Sound Pink	Pink	Exposure Factor	Flooding	2	10	6	4	0	1.7	0.781025
Puget Sound Pink	Pink	Sensitivity Attribute	Juvenile freshwater stage	2.75	14	5	1	0	1.35	0.572276
Puget Sound Pink	Pink	Exposure Factor	Hydrologic regime	2.75	4	5	8	3	2.5	0.974679
Puget Sound Pink	Pink	Sensitivity Attribute	Cumulative life‑cycle effects	2.25	2	11	6	1	2.3	0.714143
Puget Sound Pink	Pink	Sensitivity Attribute	Marine stage	2.25	5	7	6	2	2.25	0.942072
Puget Sound Pink	Pink	Exposure Factor	Sea surface temperature	2.5	0	6	11	3	2.85	0.653835
Puget Sound Pink	Pink	Exposure Factor	Ocean acidification exposure	3	0	0	3	17	3.85	0.357071
Puget Sound Pink	Pink	Sensitivity Attribute	Other stressors	2.75	3	10	4	3	2.35	0.90967
Puget Sound Pink	Pink	Exposure Factor	Upwelling	2	11	9	0	0	1.45	0.497494
Puget Sound Pink	Pink	Sensitivity Attribute	Hatchery influence	2.75	14	5	1	0	1.35	0.572276
Puget Sound Pink	Pink	Exposure Factor	Sea level rise	2	0	7	10	3	2.8	0.678233
Puget Sound Pink	Pink	Sensitivity Attribute	Ocean acidification sensitivity	1	3	8	8	1	2.35	0.792149
Puget Sound Pink	Pink	Exposure Factor	Stream temperature	2.75	6	7	6	1	2.1	0.888819
Puget Sound Pink	Pink	Exposure Factor	Summer water deficit	2	6	10	4	0	1.9	0.7
Puget Sound Steelhead	Steelhead	Sensitivity Attribute	Adult freshwater stage	2.75	8	11	1	0	1.65	0.572276
Puget Sound Steelhead	Steelhead	Sensitivity Attribute	Population viability	2.5	0	9	8	3	2.7	0.714143
Puget Sound Steelhead	Steelhead	Exposure Factor	Ocean currents	1	9	7	4	0	1.75	0.766485
Puget Sound Steelhead	Steelhead	Sensitivity Attribute	Early life history	2.75	10	10	0	0	1.5	0.5
Puget Sound Steelhead	Steelhead	Sensitivity Attribute	Estuary stage	2.25	8	11	1	0	1.65	0.572276
Puget Sound Steelhead	Steelhead	Exposure Factor	Flooding	2	0	3	13	4	3.05	0.589491
Puget Sound Steelhead	Steelhead	Sensitivity Attribute	Juvenile freshwater stage	2.75	5	10	4	1	2.05	0.804674
Puget Sound Steelhead	Steelhead	Exposure Factor	Hydrologic regime	2.75	1	6	9	4	2.8	0.812404
Puget Sound Steelhead	Steelhead	Sensitivity Attribute	Cumulative life‑cycle effects	2	4	8	7	1	2.25	0.829156
Puget Sound Steelhead	Steelhead	Sensitivity Attribute	Marine stage	2	1	7	9	3	2.7	0.781025
Puget Sound Steelhead	Steelhead	Exposure Factor	Sea surface temperature	2.25	0	4	8	8	3.2	0.748331
Puget Sound Steelhead	Steelhead	Exposure Factor	Ocean acidification exposure	3	0	0	3	17	3.85	0.357071
Puget Sound Steelhead	Steelhead	Sensitivity Attribute	Other stressors	2.5	0	3	13	4	3.05	0.589491
Puget Sound Steelhead	Steelhead	Exposure Factor	Upwelling	1.75	10	10	0	0	1.5	0.5
Puget Sound Steelhead	Steelhead	Sensitivity Attribute	Hatchery influence	2.5	0	3	10	7	3.2	0.678233
Puget Sound Steelhead	Steelhead	Exposure Factor	Sea level rise	2	12	8	0	0	1.4	0.489898
Puget Sound Steelhead	Steelhead	Sensitivity Attribute	Ocean acidification sensitivity	1.75	5	13	2	0	1.85	0.572276
Puget Sound Steelhead	Steelhead	Exposure Factor	Stream temperature	2.5	2	4	6	8	3	1
Puget Sound Steelhead	Steelhead	Exposure Factor	Summer water deficit	2	0	11	4	5	2.7	0.842615
Sacramento River winter-run Chinook	Chinook	Sensitivity Attribute	Adult freshwater stage	3	5	0	7	8	3.4	1.17898
Sacramento River winter-run Chinook	Chinook	Sensitivity Attribute	Population viability	3	0	0	2	18	3.9	0.3
Sacramento River winter-run Chinook	Chinook	Exposure Factor	Ocean currents	1	8	8	3	1	1.85	0.852936
Sacramento River winter-run Chinook	Chinook	Sensitivity Attribute	Early life history	2.75	0	0	1	19	3.95	0.217945
Sacramento River winter-run Chinook	Chinook	Sensitivity Attribute	Estuary stage	2	0	1	9	10	3.5	0.589491
Sacramento River winter-run Chinook	Chinook	Exposure Factor	Flooding	1.25	0	6	5	9	3.45	0.852936
Sacramento River winter-run Chinook	Chinook	Sensitivity Attribute	Juvenile freshwater stage	2.75	0	1	4	15	3.7	0.556776
Sacramento River winter-run Chinook	Chinook	Exposure Factor	Hydrologic regime	1.75	1	7	11	1	2.35	0.663325
Sacramento River winter-run Chinook	Chinook	Sensitivity Attribute	Cumulative life‑cycle effects	2.5	0	0	1	19	3.95	0.217945
Sacramento River winter-run Chinook	Chinook	Sensitivity Attribute	Marine stage	2.25	0	1	9	10	3.45	0.589491
Sacramento River winter-run Chinook	Chinook	Exposure Factor	Sea surface temperature	2	0	0	12	8	3.4	0.489898
Sacramento River winter-run Chinook	Chinook	Exposure Factor	Ocean acidification exposure	2.5	0	0	0	20	4	0
Sacramento River winter-run Chinook	Chinook	Sensitivity Attribute	Other stressors	1.75	0	0	3	17	3.85	0.357071
Sacramento River winter-run Chinook	Chinook	Exposure Factor	Upwelling	1	1	5	9	5	2.9	0.830662
Sacramento River winter-run Chinook	Chinook	Sensitivity Attribute	Hatchery influence	3	0	20	0	0	2	0
Sacramento River winter-run Chinook	Chinook	Exposure Factor	Sea level rise	2.25	0	2	7	11	3.45	0.668954
Sacramento River winter-run Chinook	Chinook	Sensitivity Attribute	Ocean acidification sensitivity	1	6	13	1	0	1.75	0.53619
Sacramento River winter-run Chinook	Chinook	Exposure Factor	Stream temperature	2	0	6	7	7	3.05	0.804674
Sacramento River winter-run Chinook	Chinook	Exposure Factor	Summer water deficit	1.75	2	6	9	3	2.55	0.852936
Snake River Basin Steelhead	Steelhead	Sensitivity Attribute	Adult freshwater stage	2.5	0	4	12	4	2.75	0.632456
Snake River Basin Steelhead	Steelhead	Sensitivity Attribute	Population viability	2.5	0	12	6	2	2.5	0.67082
Snake River Basin Steelhead	Steelhead	Exposure Factor	Ocean currents	1	9	7	4	0	1.75	0.766485
Snake River Basin Steelhead	Steelhead	Sensitivity Attribute	Early life history	2.75	10	10	0	0	1.5	0.5
Snake River Basin Steelhead	Steelhead	Sensitivity Attribute	Estuary stage	2.25	9	10	1	0	1.6	0.583095
Snake River Basin Steelhead	Steelhead	Exposure Factor	Flooding	2	2	3	12	3	2.8	0.812404
Snake River Basin Steelhead	Steelhead	Sensitivity Attribute	Juvenile freshwater stage	2.75	4	11	4	1	2.1	0.768115
Snake River Basin Steelhead	Steelhead	Exposure Factor	Hydrologic regime	2.75	4	7	6	3	2.4	0.969536
Snake River Basin Steelhead	Steelhead	Sensitivity Attribute	Cumulative life‑cycle effects	2	2	6	8	4	2.7	0.9
Snake River Basin Steelhead	Steelhead	Sensitivity Attribute	Marine stage	2	5	12	2	1	1.95	0.739932
Snake River Basin Steelhead	Steelhead	Exposure Factor	Sea surface temperature	2.25	0	4	8	8	3.2	0.748331
Snake River Basin Steelhead	Steelhead	Exposure Factor	Ocean acidification exposure	3	0	0	3	17	3.85	0.357071
Snake River Basin Steelhead	Steelhead	Sensitivity Attribute	Other stressors	2.5	0	3	12	5	3.1	0.6245
Snake River Basin Steelhead	Steelhead	Exposure Factor	Upwelling	1.75	9	10	1	0	1.6	0.583095
Snake River Basin Steelhead	Steelhead	Sensitivity Attribute	Hatchery influence	2.5	0	2	11	7	3.25	0.622495
Snake River Basin Steelhead	Steelhead	Exposure Factor	Sea level rise	2	13	7	0	0	1.35	0.47697
Snake River Basin Steelhead	Steelhead	Sensitivity Attribute	Ocean acidification sensitivity	1.75	5	13	2	0	1.85	0.572276
Snake River Basin Steelhead	Steelhead	Exposure Factor	Stream temperature	2.5	0	1	8	11	3.5	0.591608
Snake River Basin Steelhead	Steelhead	Exposure Factor	Summer water deficit	2	0	7	6	7	3	0.83666
Snake River fall-run Chinook	Chinook	Sensitivity Attribute	Adult freshwater stage	2.75	0	6	11	3	2.85	0.653835
Snake River fall-run Chinook	Chinook	Sensitivity Attribute	Population viability	2.75	3	9	8	0	2.25	0.698212
Snake River fall-run Chinook	Chinook	Exposure Factor	Ocean currents	1.25	7	9	4	0	1.85	0.726292
Snake River fall-run Chinook	Chinook	Sensitivity Attribute	Early life history	3	14	6	0	0	1.3	0.458258
Snake River fall-run Chinook	Chinook	Sensitivity Attribute	Estuary stage	2	4	11	5	0	2.05	0.668954
Snake River fall-run Chinook	Chinook	Exposure Factor	Flooding	2	5	6	6	3	2.35	1.01366
Snake River fall-run Chinook	Chinook	Sensitivity Attribute	Juvenile freshwater stage	3	11	8	1	0	1.5	0.591608
Snake River fall-run Chinook	Chinook	Exposure Factor	Hydrologic regime	2.5	8	5	5	2	2.05	1.02347
Snake River fall-run Chinook	Chinook	Sensitivity Attribute	Cumulative life‑cycle effects	2.25	0	11	9	0	2.45	0.497494
Snake River fall-run Chinook	Chinook	Sensitivity Attribute	Marine stage	2	1	9	8	2	2.55	0.739932
Snake River fall-run Chinook	Chinook	Exposure Factor	Sea surface temperature	2	0	3	14	3	3	0.547723
Snake River fall-run Chinook	Chinook	Exposure Factor	Ocean acidification exposure	2.5	0	0	4	16	3.8	0.4
Snake River fall-run Chinook	Chinook	Sensitivity Attribute	Other stressors	3	0	6	8	6	3	0.774597
Snake River fall-run Chinook	Chinook	Exposure Factor	Upwelling	1.75	6	6	5	3	2.25	1.04283
Snake River fall-run Chinook	Chinook	Sensitivity Attribute	Hatchery influence	2.75	0	0	6	14	3.7	0.458258
Snake River fall-run Chinook	Chinook	Exposure Factor	Sea level rise	2.25	2	8	10	0	2.4	0.663325
Snake River fall-run Chinook	Chinook	Sensitivity Attribute	Ocean acidification sensitivity	1.75	5	11	4	0	1.95	0.668954
Snake River fall-run Chinook	Chinook	Exposure Factor	Stream temperature	2.25	0	1	8	11	3.5	0.591608
Snake River fall-run Chinook	Chinook	Exposure Factor	Summer water deficit	1.75	1	19	0	0	1.95	0.217945
Snake River Sockeye	Sockeye	Sensitivity Attribute	Adult freshwater stage	2.75	0	1	8	11	3.5	0.591608
Snake River Sockeye	Sockeye	Sensitivity Attribute	Population viability	2.5	0	0	7	13	3.65	0.47697
Snake River Sockeye	Sockeye	Exposure Factor	Ocean currents	1	8	8	4	0	1.8	0.748331
Snake River Sockeye	Sockeye	Sensitivity Attribute	Early life history	2.75	4	10	6	0	2.1	0.7
Snake River Sockeye	Sockeye	Sensitivity Attribute	Estuary stage	2.25	7	13	0	0	1.65	0.47697
Snake River Sockeye	Sockeye	Exposure Factor	Flooding	1.75	2	3	12	3	2.8	0.812404
Snake River Sockeye	Sockeye	Sensitivity Attribute	Juvenile freshwater stage	2.75	1	6	7	6	2.9	0.888819
Snake River Sockeye	Sockeye	Exposure Factor	Hydrologic regime	2.75	1	5	8	6	2.85	0.864581
Snake River Sockeye	Sockeye	Sensitivity Attribute	Cumulative life‑cycle effects	2	0	1	7	12	3.3	0.589491
Snake River Sockeye	Sockeye	Sensitivity Attribute	Marine stage	2.25	1	12	6	1	2.35	0.653835
Snake River Sockeye	Sockeye	Exposure Factor	Sea surface temperature	2.25	0	4	8	8	3.2	0.748331
Snake River Sockeye	Sockeye	Exposure Factor	Ocean acidification exposure	3	0	0	3	17	3.85	0.357071
Snake River Sockeye	Sockeye	Sensitivity Attribute	Other stressors	2.5	0	3	13	4	3.05	0.589491
Snake River Sockeye	Sockeye	Exposure Factor	Upwelling	1.75	8	11	1	0	1.65	0.572276
Snake River Sockeye	Sockeye	Sensitivity Attribute	Hatchery influence	2.5	3	15	2	0	1.95	0.497494
Snake River Sockeye	Sockeye	Exposure Factor	Sea level rise	2	15	5	0	0	1.25	0.433013
Snake River Sockeye	Sockeye	Sensitivity Attribute	Ocean acidification sensitivity	1.75	1	12	7	0	2.3	0.556776
Snake River Sockeye	Sockeye	Exposure Factor	Stream temperature	2.75	0	0	9	11	3.55	0.497494
Snake River Sockeye	Sockeye	Exposure Factor	Summer water deficit	2	4	9	2	5	2.4	1.06771
Snake River spring/summer-run Chinook	Chinook	Sensitivity Attribute	Adult freshwater stage	3	0	1	8	11	3.5	0.591608
Snake River spring/summer-run Chinook	Chinook	Sensitivity Attribute	Population viability	2.75	0	1	12	7	3.3	0.556776
Snake River spring/summer-run Chinook	Chinook	Exposure Factor	Ocean currents	1.25	6	8	6	0	2	0.774597
Snake River spring/summer-run Chinook	Chinook	Sensitivity Attribute	Early life history	2.75	11	9	0	0	1.45	0.497494
Snake River spring/summer-run Chinook	Chinook	Sensitivity Attribute	Estuary stage	2.75	11	9	0	0	1.45	0.497494
Snake River spring/summer-run Chinook	Chinook	Exposure Factor	Flooding	2	5	7	5	3	2.3	1.00499
Snake River spring/summer-run Chinook	Chinook	Sensitivity Attribute	Juvenile freshwater stage	3	0	2	7	11	3.45	0.668954
Snake River spring/summer-run Chinook	Chinook	Exposure Factor	Hydrologic regime	2.5	0	2	6	12	3.5	0.67082
Snake River spring/summer-run Chinook	Chinook	Sensitivity Attribute	Cumulative life‑cycle effects	2.5	0	4	10	6	3.1	0.7
Snake River spring/summer-run Chinook	Chinook	Sensitivity Attribute	Marine stage	2.25	0	8	7	5	2.85	0.792149
Snake River spring/summer-run Chinook	Chinook	Exposure Factor	Sea surface temperature	2	0	3	7	10	3.35	0.726292
Snake River spring/summer-run Chinook	Chinook	Exposure Factor	Ocean acidification exposure	2.5	0	0	4	16	3.8	0.4
Snake River spring/summer-run Chinook	Chinook	Sensitivity Attribute	Other stressors	2.75	0	4	11	5	3.05	0.668954
Snake River spring/summer-run Chinook	Chinook	Exposure Factor	Upwelling	1.75	6	6	5	3	2.25	1.04283
Snake River spring/summer-run Chinook	Chinook	Sensitivity Attribute	Hatchery influence	2.5	0	7	9	4	2.85	0.726292
Snake River spring/summer-run Chinook	Chinook	Exposure Factor	Sea level rise	2.25	10	5	5	0	1.75	0.829156
Snake River spring/summer-run Chinook	Chinook	Sensitivity Attribute	Ocean acidification sensitivity	1.75	5	12	3	0	1.9	0.6245
Snake River spring/summer-run Chinook	Chinook	Exposure Factor	Stream temperature	2.25	0	1	8	11	3.5	0.591608
Snake River spring/summer-run Chinook	Chinook	Exposure Factor	Summer water deficit	1.75	0	11	5	4	2.25	0.792149
South Central California Coast Steelhead	Steelhead	Sensitivity Attribute	Adult freshwater stage	2.5	4	8	6	2	2.3	0.9
South Central California Coast Steelhead	Steelhead	Sensitivity Attribute	Population viability	2.25	0	8	6	6	2.9	0.830662
South Central California Coast Steelhead	Steelhead	Exposure Factor	Ocean currents	1	7	9	4	0	1.85	0.726292
South Central California Coast Steelhead	Steelhead	Sensitivity Attribute	Early life history	2.25	6	12	2	0	1.8	0.6
South Central California Coast Steelhead	Steelhead	Sensitivity Attribute	Estuary stage	1.75	0	7	10	3	2.8	0.678233
South Central California Coast Steelhead	Steelhead	Exposure Factor	Flooding	1.75	0	3	10	7	3.2	0.678233
South Central California Coast Steelhead	Steelhead	Sensitivity Attribute	Juvenile freshwater stage	2.5	0	8	9	3	2.75	0.698212
South Central California Coast Steelhead	Steelhead	Exposure Factor	Hydrologic regime	2.25	14	6	0	0	1.3	0.458258
South Central California Coast Steelhead	Steelhead	Sensitivity Attribute	Cumulative life‑cycle effects	2.25	1	10	8	1	2.45	0.668954
South Central California Coast Steelhead	Steelhead	Sensitivity Attribute	Marine stage	1.5	2	10	6	2	2.4	0.8
South Central California Coast Steelhead	Steelhead	Exposure Factor	Sea surface temperature	2	0	1	10	9	3.4	0.583095
South Central California Coast Steelhead	Steelhead	Exposure Factor	Ocean acidification exposure	3	0	0	0	20	4	0
South Central California Coast Steelhead	Steelhead	Sensitivity Attribute	Other stressors	2	0	1	11	8	3.35	0.572276
South Central California Coast Steelhead	Steelhead	Exposure Factor	Upwelling	1.5	3	8	6	3	2.45	0.920598
South Central California Coast Steelhead	Steelhead	Sensitivity Attribute	Hatchery influence	1.75	16	2	1	1	1.35	0.792149
South Central California Coast Steelhead	Steelhead	Exposure Factor	Sea level rise	2	0	5	9	6	3.05	0.739932
South Central California Coast Steelhead	Steelhead	Sensitivity Attribute	Ocean acidification sensitivity	0.5	6	11	2	1	1.9	0.768115
South Central California Coast Steelhead	Steelhead	Exposure Factor	Stream temperature	2.25	3	6	6	5	2.65	1.01366
South Central California Coast Steelhead	Steelhead	Exposure Factor	Summer water deficit	2.25	3	5	8	4	2.65	0.963068
Southern California Coast Steelhead	Steelhead	Sensitivity Attribute	Adult freshwater stage	2.5	4	8	6	2	2.3	0.9
Southern California Coast Steelhead	Steelhead	Sensitivity Attribute	Population viability	2.25	0	0	13	7	3.35	0.47697
Southern California Coast Steelhead	Steelhead	Exposure Factor	Ocean currents	1	7	9	4	0	1.85	0.726292
Southern California Coast Steelhead	Steelhead	Sensitivity Attribute	Early life history	2.25	6	12	2	0	1.8	0.6
Southern California Coast Steelhead	Steelhead	Sensitivity Attribute	Estuary stage	1.75	0	7	10	3	2.8	0.678233
Southern California Coast Steelhead	Steelhead	Exposure Factor	Flooding	1.75	0	2	11	7	3.25	0.622495
Southern California Coast Steelhead	Steelhead	Sensitivity Attribute	Juvenile freshwater stage	2.5	0	8	9	3	2.75	0.698212
Southern California Coast Steelhead	Steelhead	Exposure Factor	Hydrologic regime	2.25	14	6	0	0	1.3	0.458258
Southern California Coast Steelhead	Steelhead	Sensitivity Attribute	Cumulative life‑cycle effects	2.25	1	10	6	3	2.55	0.804674
Southern California Coast Steelhead	Steelhead	Sensitivity Attribute	Marine stage	1.5	2	9	6	3	2.5	0.866025
Southern California Coast Steelhead	Steelhead	Exposure Factor	Sea surface temperature	2	0	1	10	9	3.4	0.583095
Southern California Coast Steelhead	Steelhead	Exposure Factor	Ocean acidification exposure	3	0	0	0	20	4	0
Southern California Coast Steelhead	Steelhead	Sensitivity Attribute	Other stressors	2	0	1	9	10	3.45	0.589491
Southern California Coast Steelhead	Steelhead	Exposure Factor	Upwelling	1.5	3	8	6	3	2.45	0.920598
Southern California Coast Steelhead	Steelhead	Sensitivity Attribute	Hatchery influence	1.75	16	2	1	1	1.35	0.792149
Southern California Coast Steelhead	Steelhead	Exposure Factor	Sea level rise	2	0	5	9	6	3.05	0.739932
Southern California Coast Steelhead	Steelhead	Sensitivity Attribute	Ocean acidification sensitivity	0.5	6	11	2	1	1.9	0.768115
Southern California Coast Steelhead	Steelhead	Exposure Factor	Stream temperature	2.25	3	6	6	5	2.65	1.01366
Southern California Coast Steelhead	Steelhead	Exposure Factor	Summer water deficit	2.25	2	6	8	4	2.7	0.9
Southern Oregon/Northern California Coast Coho	Coho	Sensitivity Attribute	Adult freshwater stage	2.5	10	9	1	0	1.55	0.589491
Southern Oregon/Northern California Coast Coho	Coho	Sensitivity Attribute	Population viability	3	0	0	11	9	3.45	0.497494
Southern Oregon/Northern California Coast Coho	Coho	Exposure Factor	Ocean currents	1	9	6	4	1	1.85	0.90967
Southern Oregon/Northern California Coast Coho	Coho	Sensitivity Attribute	Early life history	1.75	1	10	7	2	2.5	0.74162
Southern Oregon/Northern California Coast Coho	Coho	Sensitivity Attribute	Estuary stage	1.5	0	4	8	8	3.2	0.748331
Southern Oregon/Northern California Coast Coho	Coho	Exposure Factor	Flooding	1.25	0	1	10	9	3.4	0.583095
Southern Oregon/Northern California Coast Coho	Coho	Sensitivity Attribute	Juvenile freshwater stage	2.75	0	1	4	15	3.7	0.556776
Southern Oregon/Northern California Coast Coho	Coho	Exposure Factor	Hydrologic regime	2.25	13	7	0	0	1.35	0.47697
Southern Oregon/Northern California Coast Coho	Coho	Sensitivity Attribute	Cumulative life‑cycle effects	1.5	0	2	10	8	3.05	0.640312
Southern Oregon/Northern California Coast Coho	Coho	Sensitivity Attribute	Marine stage	2.75	0	2	9	9	3.35	0.653835
Southern Oregon/Northern California Coast Coho	Coho	Exposure Factor	Sea surface temperature	2	0	0	15	5	3.25	0.433013
Southern Oregon/Northern California Coast Coho	Coho	Exposure Factor	Ocean acidification exposure	2.5	0	0	0	20	4	0
Southern Oregon/Northern California Coast Coho	Coho	Sensitivity Attribute	Other stressors	2.25	0	0	8	12	3.6	0.489898
Southern Oregon/Northern California Coast Coho	Coho	Exposure Factor	Upwelling	1	1	5	10	4	2.85	0.792149
Southern Oregon/Northern California Coast Coho	Coho	Sensitivity Attribute	Hatchery influence	2.75	0	16	4	0	2.2	0.4
Southern Oregon/Northern California Coast Coho	Coho	Exposure Factor	Sea level rise	2	0	2	10	8	3.3	0.640312
Southern Oregon/Northern California Coast Coho	Coho	Sensitivity Attribute	Ocean acidification sensitivity	1.75	6	13	1	0	1.75	0.53619
Southern Oregon/Northern California Coast Coho	Coho	Exposure Factor	Stream temperature	2	0	0	7	13	3.65	0.47697
Southern Oregon/Northern California Coast Coho	Coho	Exposure Factor	Summer water deficit	1.75	0	8	10	2	2.7	0.640312
Upper Columbia River spring-run Chinook	Chinook	Sensitivity Attribute	Adult freshwater stage	3	0	1	8	11	3.5	0.591608
Upper Columbia River spring-run Chinook	Chinook	Sensitivity Attribute	Population viability	2.75	0	1	8	11	3.5	0.591608
Upper Columbia River spring-run Chinook	Chinook	Exposure Factor	Ocean currents	1.25	8	8	4	0	1.8	0.748331
Upper Columbia River spring-run Chinook	Chinook	Sensitivity Attribute	Early life history	2.75	11	9	0	0	1.45	0.497494
Upper Columbia River spring-run Chinook	Chinook	Sensitivity Attribute	Estuary stage	2.75	11	9	0	0	1.45	0.497494
Upper Columbia River spring-run Chinook	Chinook	Exposure Factor	Flooding	2	4	7	6	3	2.4	0.969536
Upper Columbia River spring-run Chinook	Chinook	Sensitivity Attribute	Juvenile freshwater stage	3	0	2	7	11	3.45	0.668954
Upper Columbia River spring-run Chinook	Chinook	Exposure Factor	Hydrologic regime	2.5	0	2	6	12	3.5	0.67082
Upper Columbia River spring-run Chinook	Chinook	Sensitivity Attribute	Cumulative life‑cycle effects	2.25	0	6	12	2	2.8	0.6
Upper Columbia River spring-run Chinook	Chinook	Sensitivity Attribute	Marine stage	2.25	0	8	7	5	2.85	0.792149
Upper Columbia River spring-run Chinook	Chinook	Exposure Factor	Sea surface temperature	2	0	3	7	10	3.35	0.726292
Upper Columbia River spring-run Chinook	Chinook	Exposure Factor	Ocean acidification exposure	2.5	0	0	4	16	3.8	0.4
Upper Columbia River spring-run Chinook	Chinook	Sensitivity Attribute	Other stressors	3	0	4	11	5	3.05	0.668954
Upper Columbia River spring-run Chinook	Chinook	Exposure Factor	Upwelling	1.75	6	6	5	3	2.25	1.04283
Upper Columbia River spring-run Chinook	Chinook	Sensitivity Attribute	Hatchery influence	2.5	0	4	11	5	3.05	0.668954
Upper Columbia River spring-run Chinook	Chinook	Exposure Factor	Sea level rise	2.25	10	5	5	0	1.75	0.829156
Upper Columbia River spring-run Chinook	Chinook	Sensitivity Attribute	Ocean acidification sensitivity	1.75	5	12	3	0	1.9	0.6245
Upper Columbia River spring-run Chinook	Chinook	Exposure Factor	Stream temperature	2.25	0	2	12	6	3.2	0.6
Upper Columbia River spring-run Chinook	Chinook	Exposure Factor	Summer water deficit	1.75	0	8	7	5	2.45	0.792149
Upper Columbia River Steelhead	Steelhead	Sensitivity Attribute	Adult freshwater stage	2.5	0	3	14	3	3	0.547723
Upper Columbia River Steelhead	Steelhead	Sensitivity Attribute	Population viability	2.75	1	4	7	8	3.1	0.888819
Upper Columbia River Steelhead	Steelhead	Exposure Factor	Ocean currents	1	9	7	4	0	1.75	0.766485
Upper Columbia River Steelhead	Steelhead	Sensitivity Attribute	Early life history	2.75	10	10	0	0	1.5	0.5
Upper Columbia River Steelhead	Steelhead	Sensitivity Attribute	Estuary stage	2.25	9	10	1	0	1.6	0.583095
Upper Columbia River Steelhead	Steelhead	Exposure Factor	Flooding	2	2	9	7	2	2.45	0.804674
Upper Columbia River Steelhead	Steelhead	Sensitivity Attribute	Juvenile freshwater stage	2.75	4	11	4	1	2.1	0.768115
Upper Columbia River Steelhead	Steelhead	Exposure Factor	Hydrologic regime	2.75	3	7	6	4	2.55	0.973396
Upper Columbia River Steelhead	Steelhead	Sensitivity Attribute	Cumulative life‑cycle effects	2	0	5	11	4	2.95	0.668954
Upper Columbia River Steelhead	Steelhead	Sensitivity Attribute	Marine stage	2	5	11	3	1	2	0.774597
Upper Columbia River Steelhead	Steelhead	Exposure Factor	Sea surface temperature	2.25	0	4	8	8	3.2	0.748331
Upper Columbia River Steelhead	Steelhead	Exposure Factor	Ocean acidification exposure	3	0	0	3	17	3.85	0.357071
Upper Columbia River Steelhead	Steelhead	Sensitivity Attribute	Other stressors	2.5	0	2	12	6	3.2	0.6
Upper Columbia River Steelhead	Steelhead	Exposure Factor	Upwelling	1.75	9	10	1	0	1.6	0.583095
Upper Columbia River Steelhead	Steelhead	Sensitivity Attribute	Hatchery influence	2.5	0	2	11	7	3.25	0.622495
Upper Columbia River Steelhead	Steelhead	Exposure Factor	Sea level rise	2	13	7	0	0	1.35	0.47697
Upper Columbia River Steelhead	Steelhead	Sensitivity Attribute	Ocean acidification sensitivity	1.75	5	13	2	0	1.85	0.572276
Upper Columbia River Steelhead	Steelhead	Exposure Factor	Stream temperature	2.5	0	2	9	9	3.35	0.653835
Upper Columbia River Steelhead	Steelhead	Exposure Factor	Summer water deficit	2	0	7	11	2	2.75	0.622495
Upper Willamette River Chinook	Chinook	Sensitivity Attribute	Adult freshwater stage	2.75	0	1	6	13	3.6	0.583095
Upper Willamette River Chinook	Chinook	Sensitivity Attribute	Population viability	2.75	0	1	7	12	3.55	0.589491
Upper Willamette River Chinook	Chinook	Exposure Factor	Ocean currents	1.25	8	8	4	0	1.8	0.748331
Upper Willamette River Chinook	Chinook	Sensitivity Attribute	Early life history	3	13	7	0	0	1.35	0.47697
Upper Willamette River Chinook	Chinook	Sensitivity Attribute	Estuary stage	2.25	4	14	2	0	1.9	0.538516
Upper Willamette River Chinook	Chinook	Exposure Factor	Flooding	2	2	4	10	4	2.8	0.87178
Upper Willamette River Chinook	Chinook	Sensitivity Attribute	Juvenile freshwater stage	3	0	6	10	4	2.9	0.7
Upper Willamette River Chinook	Chinook	Exposure Factor	Hydrologic regime	2.5	0	2	13	5	3.15	0.572276
Upper Willamette River Chinook	Chinook	Sensitivity Attribute	Cumulative life‑cycle effects	2	0	4	7	9	3.25	0.766485
Upper Willamette River Chinook	Chinook	Sensitivity Attribute	Marine stage	1.75	1	13	6	0	2.25	0.53619
Upper Willamette River Chinook	Chinook	Exposure Factor	Sea surface temperature	2	0	3	7	10	3.35	0.726292
Upper Willamette River Chinook	Chinook	Exposure Factor	Ocean acidification exposure	2.5	0	0	4	16	3.8	0.4
Upper Willamette River Chinook	Chinook	Sensitivity Attribute	Other stressors	3	0	2	7	11	3.45	0.668954
Upper Willamette River Chinook	Chinook	Exposure Factor	Upwelling	1.75	6	6	5	3	2.25	1.04283
Upper Willamette River Chinook	Chinook	Sensitivity Attribute	Hatchery influence	2.5	0	0	4	16	3.8	0.4
Upper Willamette River Chinook	Chinook	Exposure Factor	Sea level rise	2.25	7	7	6	0	1.95	0.804674
Upper Willamette River Chinook	Chinook	Sensitivity Attribute	Ocean acidification sensitivity	1.75	5	12	3	0	1.9	0.6245
Upper Willamette River Chinook	Chinook	Exposure Factor	Stream temperature	2.25	0	0	8	12	3.6	0.489898
Upper Willamette River Chinook	Chinook	Exposure Factor	Summer water deficit	1.75	0	14	5	1	2.35	0.572276
Upper Willamette River Steelhead	Steelhead	Sensitivity Attribute	Adult freshwater stage	2.75	9	11	0	0	1.55	0.497494
Upper Willamette River Steelhead	Steelhead	Sensitivity Attribute	Population viability	2.75	2	8	10	0	2.4	0.663325
Upper Willamette River Steelhead	Steelhead	Exposure Factor	Ocean currents	1	9	7	4	0	1.75	0.766485
Upper Willamette River Steelhead	Steelhead	Sensitivity Attribute	Early life history	2.75	10	10	0	0	1.5	0.5
Upper Willamette River Steelhead	Steelhead	Sensitivity Attribute	Estuary stage	2.25	9	10	1	0	1.6	0.583095
Upper Willamette River Steelhead	Steelhead	Exposure Factor	Flooding	2	5	4	8	3	2.45	1.02347
Upper Willamette River Steelhead	Steelhead	Sensitivity Attribute	Juvenile freshwater stage	2.75	2	10	7	1	2.35	0.726292
Upper Willamette River Steelhead	Steelhead	Exposure Factor	Hydrologic regime	2.75	7	6	5	2	2.1	0.994987
Upper Willamette River Steelhead	Steelhead	Sensitivity Attribute	Cumulative life‑cycle effects	2	1	10	7	2	2.5	0.74162
Upper Willamette River Steelhead	Steelhead	Sensitivity Attribute	Marine stage	2	5	11	3	1	2	0.774597
Upper Willamette River Steelhead	Steelhead	Exposure Factor	Sea surface temperature	2.25	0	4	8	8	3.2	0.748331
Upper Willamette River Steelhead	Steelhead	Exposure Factor	Ocean acidification exposure	3	0	0	3	17	3.85	0.357071
Upper Willamette River Steelhead	Steelhead	Sensitivity Attribute	Other stressors	2.5	0	2	12	6	3.2	0.6
Upper Willamette River Steelhead	Steelhead	Exposure Factor	Upwelling	1.75	7	11	2	0	1.75	0.622495
Upper Willamette River Steelhead	Steelhead	Sensitivity Attribute	Hatchery influence	2.5	0	5	10	5	3	0.707107
Upper Willamette River Steelhead	Steelhead	Exposure Factor	Sea level rise	2	13	7	0	0	1.35	0.47697
Upper Willamette River Steelhead	Steelhead	Sensitivity Attribute	Ocean acidification sensitivity	1.75	4	14	2	0	1.9	0.538516
Upper Willamette River Steelhead	Steelhead	Exposure Factor	Stream temperature	2.5	0	0	7	13	3.65	0.47697
Upper Willamette River Steelhead	Steelhead	Exposure Factor	Summer water deficit	2	0	9	5	6	2.85	0.852936
